# Supplementary material for: The Impact of the Internet on Health Consultation Market Concentration: An Econometric Analysis of Secondary Data
Source: PubMed Central journal article supplement (PMC5106558; doi:10.2196/jmir.6423), 2016-10-28
Supplement: jmir_v18i10e276_app2.pdf [file jmir_v18i10e276_app2.pdf]

## Robustness Check

We ran a robustness check by using alternative measures for reputation and self-endeavor (shown in Table 4). In the main analysis, reputation is measured by the combination of votes, gifts and thank-you letters. In the robustness check, reputation is measured by votes (Model 5), gifts (Model 6) or thank-you letters (Model 7), respectively. The model parameter estimates remain consistent with the main results in Model 3.

Similarly, in the main analysis, self-representation is measured by the combination of number of papers posted and number of free services provided. In the robustness check, we measure self-representation using number of papers (Model 9) or number of free services (Model 10), respectively. The model parameter estimates remain the same as the result in Model 4. Therefore, the results reported in the main analysis are robust.

Table 4. Robustness Check.

| Variable                | Model 5                        | Model 6                        | Model 7                        | Model 8                        | Model 9                        |
|-------------------------|--------------------------------|--------------------------------|--------------------------------|--------------------------------|--------------------------------|
| Position                | -0.007<br>(0.019)<br>P=.71     | 0.003<br>(0.019)<br>P=.87      | -0.002<br>(0.019)<br>P=.91     | -0.0003<br>(0.020)<br>P=.99    | 0.004t<br>(0.017)<br>P=.84     |
| Level                   | 0.015<br>(0.038)<br>P=.69      | 0.003<br>(0.039)<br>P=.93      | 0.011<br>(0.038)<br>P=.78      | 0.007<br>(0.040)<br>P=.86      | 0.024<br>(0.034)<br>P=.48      |
| Price                   | 0.0004<br>(0.0005)<br>P=.35    | 0.0001<br>(0.0005)<br>P=.85    | 0.0005<br>(0.0005)<br>P=.32    | -0.0001<br>(0.0005)<br>P=.81   | -0.001+<br>(0.0004)<br>P=.08   |
| Duration                | -0.0002<br>(0.001)<br>P=.84    | 0.0003<br>(0.001)<br>P=.72     | -0.0001<br>(0.001)<br>P=.88    | 0.0001<br>(0.001)<br>P=.87     | -0.001<br>(0.001)<br>P=.34     |
| Lrank                   | -2.181***<br>(0.025)<br>P=.000 | -2.131***<br>(0.023)<br>P=.000 | -2.178***<br>(0.024)<br>P=.000 | -2.048***<br>(0.023)<br>P=.000 | -2.579***<br>(0.031)<br>P=.000 |
| Reputation(vote)        | -0.028***<br>(0.002)<br>P=.000 |                                |                                |                                |                                |
| Reputation (vote)*Lrank | 0.006***<br>(0.0003)<br>P=.000 |                                |                                |                                |                                |
| Reputation (gift)       |                                | -0.013***<br>(0.001)<br>P=.000 |                                |                                |                                |

|                                          |                                |                                |                                |                                |                                |
|------------------------------------------|--------------------------------|--------------------------------|--------------------------------|--------------------------------|--------------------------------|
| Reputation(gift)*Lrank                   |                                | 0.003***<br>(0.0002)<br>P=.000 |                                |                                |                                |
| Reputation (thank-you letter)            |                                |                                | -0.079***<br>(0.004)<br>P=.000 |                                |                                |
| Reputation (thank-you letter)*Lrank      |                                |                                | 0.016***<br>(0.001)<br>P=.000  |                                |                                |
| Self-Representation(articles)            |                                |                                |                                | -0.020***<br>(0.002)<br>P=.000 |                                |
| Self-Representation (articles)*Lrank     |                                |                                |                                | 0.004***<br>(0.0003)<br>P=.000 |                                |
| Self-Representation (free service)       |                                |                                |                                |                                | -0.001***<br>(0.000)<br>P=.000 |
| Self-Representation (free service)*Lrank |                                |                                |                                |                                | 0.0002***<br>(0.000)<br>P=.000 |
| Constant                                 | 16.269***<br>(0.211)<br>P=.000 | 16.072***<br>(0.209)<br>P=.000 | 16.282***<br>(0.209)<br>P=.000 | 15.607***<br>(0.210)<br>P=.000 | 18.987***<br>(0.241)<br>P=.000 |
| R2                                       | 0.812                          | 0.811                          | 0.815                          | 0.798                          | 0.85                           |

Note: The number in parentheses are standard error. +P<.1; \*P<.05; \*\*P<.01; \*\*\*P<.001.
